# Supplementary material for: Endocannabinoid system and mood responses to acute aerobic exercise in adult cancer patients versus healthy controls
Source: Research Square preprint supplement (doi:10.21203/rs.3.rs-7028112/v1), 2025-09-30
Supplement: Supplementary file 1 [file 7c55cd7ce493ff7f1cf4c660.docx]

**Endocannabinoid system and mood responses to acute aerobic exercise in adult cancer patients versus healthy controls: A pilot study**

**Authors’ names, degrees, contact email:**

1-3Birinder S. Cheema, PhD, AEP; email: [B.Cheema@westernsydney.edu.au](mailto:B.Cheema@westernsydney.edu.au)

3,4Mitchell Low, PhD; email: [Mitchell.Low@westernsydney.edu.au](mailto:Mitchell.Low@westernsydney.edu.au)

5Shelley Kay, PhD, AEP; email: [Shelley.Kay@lh.org.au](mailto:Shelley.Kay@lh.org.au)

5Justine Stehn, PhD; email: [justine.stehn@lh.org.au](mailto:justine.stehn@lh.org.au)

3Damian Hall, MRes; email: [D.Hall@westernsydney.edu.au](mailto:D.Hall@westernsydney.edu.au)

6Abha Gourshettiwar, BClinSci; email: [20203809@student.westernsydney.edu.au](mailto:20203809@student.westernsydney.edu.au)

7Sara Wahlroos, MBBS, FRACP, PhD; email: [Sara.Wahlroos@lh.org.au](mailto:Sara.Wahlroos@lh.org.au)

7Michelle Harrison, MBBS, FRACP; email: [Michelle.Harrison@lh.org.au](mailto:Michelle.Harrison@lh.org.au)

3-4,8Judith Lacey, MBBS, FRACGP, FAChPM; Email: [judith.lacey@lh.org.au](mailto:judith.lacey@lh.org.au)

**Authors’ affiliations:**

1School of Health Sciences, University of Western Sydney, Locked Bag 1797, Penrith, NSW 2751, Australia

2Translational Health Research Institute, Locked Bag 1797, Penrith, NSW 2751, Australia

3National Institute of Complementary Medicine, Western Sydney University, Locked Bag 1797, Penrith, NSW 2751, Australia

4ARC Training Centre for Facilitated Advancement of Australia's Bioactive, Macquarie University, North Ryde, NSW 2109, Australia

5Department of Supportive Care and Integrative Oncology, Chris O’Brien Lifehouse, Camperdown, NSW 2050, Australia

6School of Medicine, Western Sydney University, Locked Bag 1797, Penrith, NSW 2751, Australia

7 Department of Medical Oncology, Chris O’Brien Lifehouse, Camperdown, NSW 2050, Australia

8School of Medicine, The University of Sydney, Camperdown, NSW 2050, Australia

**Corresponding Author:**

Birinder Singh Bobby Cheema, PhD, AEP; School of Science and Health, University of Western Sydney, Locked Bag 1797, Penrith, New South Wales, 2751, Australia; Phone:+61-2-4620-3795; Email: [B.Cheema@westernsydney.edu.au](mailto:B.Cheema@westernsydney.edu.au)

**APPENDIX A: Protocol and preliminary validation of endocannabinoid analysis**

**Abbreviations**: AEA, anandamide; PEA, palmitoylethanolamide; 2-AG, 2-arachidonoylglycerol; 1-AG, 1-arachidonoylglycerol; OEA, oleoylethanolamide; SEA, stearoylethanolamide; -d#, isotope of preceding compound with # number of deuterium atoms; MRM, Multiple reaction monitoring; ECS, endocannabinoid system; CV, coefficient of variation (standard deviation / mean); ECS, endocannabinoid system; and QC, quality control.

**Modified QuEChERS Sample Preparation and LC-MS/MS Instrumental Analysis**

Plasma samples were defrosted immediately prior to analysis. Plasma (500 µL) was spiked with deuterated internal standards (30 µL), and then proteins were precipitated by acetonitrile (300 µL) with vortex mixing and cold sonication for 5 min. Liquid-liquid extraction was facilitated by the addition of QuEChERS salt (125 mg), with subsequent vortex mixing, cold sonication and centrifugation at 18000g for 5 min. The upper organic layer (150 µL) was removed to a low recovery insert and mixed with equal volume MS grade water. Extracted samples were stored in an autosampler at 5 °C for no more than 24 hours before analysis.

Analytical separation of ECS markers was performed on a Shimadzu ultra-fast liquid chromatography system, constructed of the following modules: command unit (CBM-20 A), degassing unit (DGU-20 A5R), binary pumps (LC-30 CE), autosampler (SIL-30 AC), and a column oven (CTO-20 A). Stationary phase was a Shimadzu Shim-pack Scepter C18–120 (50 × 2.1 mm × 1.9 μm) analytical column, heated to 40 °C. Mobile phases were (A) water, and (B) acetonitrile; both modified with 0.1% formic acid, and all MS grade (Supelco® Merck). Elution by a high-pressure gradient was programmed as follows: 00.00-00.80 min, 35% B, 0.4 mL/min; 00.80-08.50 min, 35-95% B, 0.4 mL/min; 08.50-09.00 min, 95% B, 0.6 mL/min; 09.00-11.00 min, 05% B, 0.6 mL/min; and 11.00-12.00 min, 35% B, 0.4 mL/min. Certified standards for ECS markers (Cayman Chemical Company, distributed by Sapphire Bioscience) were used to determine typical retention times under this gradients as follows: AEA, 5.85 min; PEA, 6.26 min; 2-AG, 6.31 min; 1-AG, 6.41 min; OEA, 6.55 min; and SEA, 7.37 min. Deuterated internals standards (Cambridge Isotope Laboratories) have the same retention time as the corresponding reference standard.

Analytical detection of ECS markers was by a Shimadzu LCMS-8040 triple quadrupole mass spectrometer with electrospray ionisation. Parameters were programmed as follows: nitrogen drying flow, 10.0 L/min; nitrogen nebulising flow, 3.0 L/min; argon collision-induced dissociation pressure (standby), 17 kPa; desolvation line (DL) bias, 0 V; DL temperature, 250 °C; and heat block temperature, 400 °C. Optimised (+)-mode MRM events for the detection of ECS markers and deuterated internal standards are described in Table A1. For the automated optimisation, the following constraints and resolutions applied: mass-charge ratios, range from initial value ± 0.5 m/z, resolution of 0.05 m/z; and voltages, range of -5 V to -40 V, resolution of 0.1 V. Whilst the pre-rod bias of the SEA transition +328.20 > +311.40 m/z was at the boundary of -5 V, it was considered unsuitable to lower the bias further owing to the nature of the electrospray ionisation. Dwell times were set manually. The high SEA dwell time set due to lower sensitivity and the absence of other compounds of interest to be monitored in the corresponding retention time window.

Table A1. Optimised (+)-mode MRM events for ECS markers and internal standards

| Compound | Precursor,  m/z | Product,  m/z | Pre-rod bias (Q1),  V | Collision Energy,  V | Post-rod bias (Q3),  V | Dwell time,  ms |
| --- | --- | --- | --- | --- | --- | --- |
| AEA | +348.30 | +62.10 | -16.6 | -13.3 | -23.9 | 72.0 |
| AEA-d4 | +352.20 | +66.20 | -7.9 | -13.7 | -13.7 | 72.0 |
| PEA | +300.30 | +283.30  +239.30 | -31.1  -19.5 | -13.3  -12.8 | -31.1  -18.1 | 34.0 |
| 2-AG | +379.30 | +287.30 | -13.7 | -10.4 | -32.6 | 67.0 |
| 2-AG-d5 | +384.20 | +287.30  +269.30 | -10.8  -10.8 | -14.2  -15.7 | -14.2  -15.7 | 34.0 |
| 1-AG | +379.30 | +287.30 | -18.1 | -12.8 | -22.4 | 72.0 |
| OEA | +326.30 | +308.30  +247.30 | -32.6  -23.9 | -18.1  -16.6 | -28.2  -22.4 | 34.0 |
| OEA-d4 | +330.20 | +313.40  +247.30 | -9.4  -15.2 | -14.2  -13.7 | -23.9  -29.7 | 34.0 |
| SEA | +328.20 | +311.40  +85.15 | -5.0  -35.5 | -17.1  -22.0 | -29.7  -16.6 | 297.0 |

ECS markers in extracted samples (triplicate injections) were quantified against freshly prepared standard curves (external standard duplicate injections). All extracts and standards were injected at equal volumes (50 µL). Quantifications were adjusted against deuterated internal standards: AEA against AEA-d4; PEA, OEA, and SEA, against OEA-d4; and 2-AG and 1-AG, against 2-AG-d5.

**Analytical precision**

Precision inherent of the instrumental variation was determined as the CV from replicate injections of a 0.5 ng/mL standard. Instrument precision ranged from 1.7% to 9.6%, all acceptably less than 10%. Method precision was evaluated from a QC sample of pooled excess plasma. The QC sample was analysed to determine native abundance of ECS markers with four sample preparations and three replicate injections. The CV between these replicates was taken as the method precision, and are reported is Table A2. Precision of replicate preparations ranged from 3.2% to 12.6%, all acceptably within a limit of 20%. For ECS markers that were present at >10 ng/mL, the precision of replicate preparations was 5.6% (OEA) and 3.2% (2-AG), both within a more conservative criteria of 10% considering the higher concentration. The precision of replicate injections was comparable to that of the replicate preparations for AEA and PEA; yet the replicate injections were considerably more variable than replicate preparations for 2-AG, OEA, and especially SEA. Accordingly, replicate injections but not replicate sample preparations were applied for routine application of the method, as this would likely capture a greater degree of the possible variance. A reference standard of 1-AG was not available at the time of this preliminary validation experiment, but was retrospectively studied. The mean replicate injection CV for the determination of 1-AG from each batch of analysis for the present study is taken as a measure of precision: 14.6%, 16.9%, and 18.3%. These precisions were within 20%, and are expected to be liberal estimates when compared to replicate sample preparations.

Table A2. Analytical precision for the quantification of ECS markers in plasma; values reported as mean ± standard deviation (coefficient of variation %).

| Compound | Instrument precision | Method precision  Concentration in plasma, ng/mL | | | | |
| --- | --- | --- | --- | --- | --- | --- |
| Determination 1,  n = 3 injections | Determination 2,  n = 3 injections | Determination 3,  n = 3 injections | Determination 4,  n = 3 injections | AV determination,  n = 4 preparations |
| AEA | (4.5%) | 0.584 ± 0.003  (0.5%) | 0.601 ± 0.019  (3.2%) | 0.593 ± 0.034  (5.7%) | 0.555 ± 0.038  (6.9%) | 0.585 ± 0.023  (4.0%) |
| PEA | (4.2%) | 2.523 ± 0.112  (4.4%) | 2.511 ± 0.173  (6.9%) | 2.618 ± 0.232  (8.9%) | 3.123 ± 0.103  (3.3%) | 2.694 ± 0.290  (10.8%) |
| 2-AG | (3.6%) | 45.09 ± 2.88  (6.4%) | 46.16 ± 5.95  (12.9%) | 45.90 ± 6.75  (14.7%) | 48.58 ± 1.91  (3.9%) | 46.43 ± 1.50  (3.2%) |
| 1-AG | (4.3%) |  |  |  |  |  |
| OEA | (9.6%) | 11.81 ± 0.52  (4.4%) | 11.26 ± 1.06  (9.5%) | 12.62 ± 1.43  (11.3%) | 11.21 ± 0.83  (7.4%) | 11.73 ± 0.66  (5.6%) |
| SEA | (1.7%) | 1.120 ± 0.366  (32.7%) | 1.080 ± 0.344  (31.8%) | 1.207 ± 0.484  (40.1%) | 1.420 ± 0.603  (42.5%) | 1.207 ± 0.152  (12.6%) |

**Accuracy by spike-recovery**

A spike-recovery experiment was designed to evaluate the analytical accuracy of the determination of ECS markers in the matrix of patient plasma. The previously described pooled QC plasma from the precision experiment was spiked by the addition of a mixture of ECS markers in acetonitrile. Spiking was performed at three levels: 50%, 100% and 200%, relative to the native abundance estimated from an earlier exhausted pooled QC. Spiking at each level was performed with four replicates. The volume of acetonitrile for protein precipitation was adjusted to keep the same final volume. Sample preparation was otherwise the sample as the protocol described in the manuscript. The expected and measured concentrations from the spike-recovery experiment are described in Table A3. Recoveries of SEA across the three levels were consistently low at between 59.0% and 67.9%; rendering the method only semi-quantitative for this marker, likely due to a significant degree of protein binding. The method is considered fully quantitative for the other markers tested, with a mean recovery of 90.7% (range 71.2% to 106.7%); within 30% for all tests, and within 20% for those ECS markers present at >1 ng/mL. As 1-AG followed the same mass transition as the 2-AG MRM (Table A1) and existed at a similar retention time (6.41 vs 6.31 min), it was reasonable to infer that potentially interfering species would be similar such that 1-AG quantification is comparable to the accuracy achieved by 2-AG quantification.

Table A3. Spike-recovery experiment as a measure of analytical accuracy for the determination of ECS markers in the matrix of human plasma; values reported as mean of n = 4 replicate spikes.

| Compound | Spike Level,  % of native | Spike Concentration,  ng/mL | Expected Concentration  (spike [A3] + precision [A2]),  ng/mL | Measured Concentration,  ng/mL | Accuracy  (measured / expected)  % |
| --- | --- | --- | --- | --- | --- |
| AEA | 50% | 0.25 | 0.835 | 0.704 | 84.2% |
|  | 100% | 0.50 | 1.085 | 0.852 | 78.5% |
|  | 200% | 1.00 | 1.585 | 1.128 | 71.2% |
| PEA | 50% | 0.65 | 3.344 | 2.895 | 86.6% |
|  | 100% | 1.30 | 3.994 | 3.430 | 85.9% |
|  | 200% | 2.60 | 5.294 | 4.354 | 82.2% |
| 2-AG | 50% | 1.00 | 47.43 | 46.85 | 98.8% |
|  | 100% | 2.00 | 48.43 | 46.59 | 96.2% |
|  | 200% | 4.00 | 50.43 | 53.79 | 106.7% |
| OEA | 50% | 2.45 | 14.18 | 13.41 | 94.6% |
|  | 100% | 4.90 | 16.63 | 16.50 | 99.2% |
|  | 200% | 9.80 | 21.53 | 22.47 | 104.4% |
| SEA | 50% | 0.75 | 1.957 | 1.328 | 67.9% |
|  | 100% | 1.50 | 2.707 | 1.653 | 61.1% |
|  | 200% | 3.00 | 4.207 | 2.481 | 59.0% |

**Calibration and limits**

An external calibration curve was prepared in 30% acetonitrile, as it was impractical to: apply the FDA and EMA recommendation to prepare standards in the true plasma matrix, as plasma inherently contains ECS markers; or to apply a standard-additional method for each sample, which would necessitate larger sampling volumes and would have required an undue number of runs on the instrument. The curve was prepared by serial dilution (dilution factor 10) with five levels starting from the following stock solution: 500 ng/mL of 2-AG, and 1-AG; and 50 ng/mL of AEA, PEA, OEA, and SEA. Owing to the calibration range crossing five orders of magnitude and the risk of calibration bias at the higher end of the curve, regression models were weighted by the inverse of concentration and were fit with forced intercepts (0,0); such that the equation took the form: *peak area* (ion counts) = *calibration slope* × *concentration* (ng/mL). The models of a typical batch are described in Table A3. Goodness-of-fit was considered acceptable by the analyst viewing calibration figures in the software, and by the RSQ values which were all greater than 0.99.

Analytical drift in the calibration over the longest batch of ~18 h was determined by an additional duplicate injection of a mixed standard (2-AG and 1-AG, 5 ng/mL; other ECS markers 0.5 ng/mL); such that: drift = (final area – initial area) / initial area. The drift for ECS markers except SEA ranged from -7.5% to 4.7%, all less than a change of ± 10%. Whilst the drift in SEA was unacceptable at -32%, unpublished results demonstrate that SEA present in the plasma extract solution does not experience significant drift over this time.

The limit of detection was estimated as the standard deviation from replicate injections of the lowest concentration standards peak area divided by the calibration slope, and appended to Table A3. ECS marker concentrations measured across all samples of this study were above the limit of detection. For 2-AG and OEA, the mean concentration from all plasma samples of this study was more than 100 times the limit of detection; whilst for AEA, PEA, 1-AG, and SEA, it was only more than 10 times. However, the limit of detection fell above the lowest concentration standard of the calibration range for some ECS markers: PEA, 1-AG, OEA, and SEA.

Table A3. Summary of calibration data for the measurement of ECS markers, including estimated limit of detection (LoD) and the ratio between the mean sample concentration and the LoD.

| Compound | Calibration range,  ng/mL | Calibration Slope | Coefficient of Determination  RSQ | Drift  % | LoD,  ng/mL | mean (all samples) / LoD |
| --- | --- | --- | --- | --- | --- | --- |
| AEA | 0.005 – 50 | 1.491 × 10 5 | 0.999 829 | 4.7% | 0.002 | 10.5 |
| PEA | 0.005 – 50 | 9.814 × 10 5 | 0.994 154 | 1.0% | 0.105 | 11.7 |
| 2-AG | 0.05 – 500 | 1.249 × 10 4 | 0.992 917 | -6.6% | 0.004 | 391.5 |
| 1-AG | 0.05 – 500 | 5.719 × 10 3 | 0.995 219 | -6.2% | 0.101 | 13.5 |
| OEA | 0.005 – 50 | 3.584 × 10 4 | 0.997 953 | -7.5% | 0.009 | 127.9 |
| SEA | 0.005 – 50 | 8.206 × 10 4 | 0.993 816 | -32% | 0.013 | 28.3 |
