# Supplementary material for: Endocannabinoid system and mood responses to acute aerobic exercise in adult cancer patients versus healthy controls
Source: Research Square preprint supplement (doi:10.21203/rs.3.rs-7028112/v1), 2025-09-30
Supplement: Supplementary file 2 [file 890a53665f45f7ba48ff63e4.docx]

**Cancer Patients**

**Healthy Controls**

**Reviewed (n=22)**

**Reviewed (n=33)**

**Excluded (n=11)**

Study-related exclusion (n=3)

Could not be matched (n=8)

**Excluded (n=23)**

Study-related exclusion (n=7)

Declined participation (n=2)

Could not be matched (n=14)

**Withdrew (n=1)**

Unable to cannulate (n=1)

**Consented and completed all procedures (n=10)**

**Consented and completed all procedures (n=10)**
